# Supplementary material
Source: publisher figshare collection journal article supplement (https://tandf.figshare.com/articles/dataset/_/12226631)
Supplement: Supplementary file 1 [file 1]

| Supp. **Table 1.** Rb–Sr contents and isotopic ratios of sulfide samples from the Kelan Basin VMS deposits. | | | | | | | | |
| --- | --- | --- | --- | --- | --- | --- | --- | --- |
| Ser. no | Sample No. | Mineral | Rb(ppm) | Sr(ppm) | 87Rb/86Sr | 87Sr/86Sr | 2σ | *I*Sr |
| Dadonggou Pb–Zn deposit | | | | | | | | |
| 1 | DDG16-1 | Sphalerite | 0.2703 | 0.8631 | 0.9239 | 0.715682 | 0.000008 | 0.710620 |
| 2 | DDG16-3 | Sphalerite | 0.4528 | 0.5124 | 2.6030 | 0.724953 | 0.000008 | 0.710657 |
| 3 | DDG16-5 | Sphalerite | 0.01537 | 0.5318 | 0.0856 | 0.711001 | 0.000007 | 0.710534 |
| 4 | DDG-3 | Pyrite | 0.5812 | 0.5742 | 2.9840 | 0.727152 | 0.000009 | 0.710774 |
| 5 | DDG-7 | Pyrite | 0.3248 | 1.9960 | 0.4827 | 0.713026 | 0.000007 | 0.710397 |
| Wulasigou polymetallic deposit | | | | | | | | |
| 6 | WLSGZK30-1-4 | Pyrite | 0.9856 | 0.5927 | 4.9050 | 0.737490 | 0.000008 | 0.710625 |
| 7 | WLSGZK30-1-5 | Sphalerite | 1.0340 | 0.9649 | 3.1580 | 0.727708 | 0.000007 | 0.710412 |
| 8 | WLSGZK30-1-6 | Pyrite | 0.1503 | 2.6080 | 0.1708 | 0.711093 | 0.000008 | 0.710164 |
| 9 | WLSGZK30-1-8-1 | Sphalerite | 1.3250 | 2.0320 | 1.9260 | 0.720821 | 0.000009 | 0.710304 |
| 10 | WLSGZK30-1-8-2 | Pyrite | 1.2640 | 1.4690 | 2.5470 | 0.724293 | 0.000008 | 0.710410 |
| 11 | WLSG16-46 | Sphalerite | 0.7056 | 2.5940 | 0.8071 | 0.714563 | 0.000009 | 0.710178 |
| Tiemierte polymetallic deposit | | | | | | | | |
| 12 | TMET16-2 | Sphalerite | 0.7802 | 1.1670 | 1.9820 | 0.721824 | 0.000008 | 0.710957 |
| 13 | TMET16-3 | Sphalerite | 0.8291 | 0.7519 | 3.2510 | 0.728826 | 0.000009 | 0.710890 |
| 14 | TMET16-6 | Sphalerite | 0.5329 | 0.6248 | 2.5130 | 0.724685 | 0.000008 | 0.710817 |
| 15 | TMET16-9 | Sphalerite | 0.6804 | 1.9160 | 1.0560 | 0.716641 | 0.000009 | 0.710872 |
| 16 | TMET-1 | Pyrite | 0.2408 | 1.7340 | 0.4095 | 0.712804 | 0.000008 | 0.710549 |
| 17 | TMET-2 | Pyrite | 0.1726 | 4.1280 | 0.1239 | 0.711323 | 0.000007 | 0.710644 |
